# Supplementary material for: Four human Plasmodium species quantification using droplet digital PCR
Source: PubMed Central journal article supplement (PMC5396971; doi:10.1371/journal.pone.0175771), 2017-04-19
Supplement: pone.0175771.s004.pdf [file pone.0175771.s004.pdf]

### S3 Table. Standards for Reporting Diagnostic accuracy studies (STARD) checklist used in this study

The checklist obtained from <http://www.equator-network.org/reporting-guidelines/stard> (43).

| Section & Topic          | No  | Item                                                                                                                                                   | Reported on page #                                                           |
|--------------------------|-----|--------------------------------------------------------------------------------------------------------------------------------------------------------|------------------------------------------------------------------------------|
| <b>TITLE OR ABSTRACT</b> |     |                                                                                                                                                        |                                                                              |
|                          | 1   | Identification as a study of diagnostic accuracy using at least one measure of accuracy (such as sensitivity, specificity, predictive values, or AUC)  | Page 2                                                                       |
| <b>ABSTRACT</b>          |     |                                                                                                                                                        |                                                                              |
|                          | 2   | Structured summary of study design, methods, results, and conclusions (for specific guidance, see STARD for Abstracts)                                 | Page 2                                                                       |
| <b>INTRODUCTION</b>      |     |                                                                                                                                                        |                                                                              |
|                          | 3   | Scientific and clinical background, including the intended use and clinical role of the index test                                                     | Page 3                                                                       |
|                          | 4   | Study objectives and hypotheses                                                                                                                        | Page 4                                                                       |
| <b>METHODS</b>           |     |                                                                                                                                                        |                                                                              |
| <i>Study design</i>      | 5   | Whether data collection was planned before the index test and reference standard were performed (prospective study) or after (retrospective study)     | Page 4-5                                                                     |
| <i>Participants</i>      | 6   | Eligibility criteria                                                                                                                                   | Page 4-5                                                                     |
|                          | 7   | On what basis potentially eligible participants were identified (such as symptoms, results from previous tests, inclusion in registry)                 | Page 4-5                                                                     |
|                          | 8   | Where and when potentially eligible participants were identified (setting, location and dates)                                                         | Page 4-5                                                                     |
|                          | 9   | Whether participants formed a consecutive, random or convenience series                                                                                | Page 4-5                                                                     |
| <i>Test methods</i>      | 10a | Index test, in sufficient detail to allow replication                                                                                                  | Page 6-8                                                                     |
|                          | 10b | Reference standard, in sufficient detail to allow replication                                                                                          | Page 9                                                                       |
|                          | 11  | Rationale for choosing the reference standard (if alternatives exist)                                                                                  | Page 9                                                                       |
|                          | 12a | Definition of and rationale for test positivity cut-offs or result categories of the index test, distinguishing pre-specified from exploratory         | Page 6                                                                       |
|                          | 12b | Definition of and rationale for test positivity cut-offs or result categories of the reference standard, distinguishing pre-specified from exploratory | Page 9                                                                       |
|                          | 13a | Whether clinical information and reference standard results were available to the performers/readers of the index test                                 | Reference standard results were compared with ddPCR results in Table 2.      |
|                          | 13b | Whether clinical information and index test results were available to the assessors of the reference standard                                          | Index test results were compared with reference standard results in Table 2. |
| <i>Analysis</i>          | 14  | Methods for estimating or comparing measures of diagnostic accuracy                                                                                    | Page 9-11                                                                    |
|                          | 15  | How indeterminate index test or reference standard results were handled                                                                                | There is no indeterminate index test or reference standard results.          |
|                          | 16  | How missing data on the index test and reference standard were handled                                                                                 | There is no missing data.                                                    |
|                          | 17  | Any analyses of variability in diagnostic accuracy, distinguishing pre-specified from exploratory                                                      | Page 13                                                                      |
|                          | 18  | Intended sample size and how it was determined                                                                                                         | Page 4                                                                       |
| <b>RESULTS</b>           |     |                                                                                                                                                        |                                                                              |
| <i>Participants</i>      | 19  | Flow of participants, using a diagram                                                                                                                  | Figure 1                                                                     |
|                          | 20  | Baseline demographic and clinical characteristics of participants                                                                                      | Page 4                                                                       |
|                          | 21a | Distribution of severity of disease in those with the target condition                                                                                 | No                                                                           |
|                          | 21b | Distribution of alternative diagnoses in those without the target condition                                                                            | No                                                                           |
|                          | 22  | Time interval and any clinical interventions between index test and reference standard                                                                 | Page 14<br>There is no clinical intervention.                                |
| <i>Test results</i>      | 23  | Cross tabulation of the index test results (or their distribution) by the results of the reference standard                                            | Page 13<br>Table 2                                                           |
|                          | 24  | Estimates of diagnostic accuracy and their precision (such as 95% confidence intervals)                                                                | Page 9-10                                                                    |
|                          | 25  | Any adverse events from performing the index test or the reference standard                                                                            | No                                                                           |
| <b>DISCUSSION</b>        |     |                                                                                                                                                        |                                                                              |

|                          |           |                                                                                                       |         |
|--------------------------|-----------|-------------------------------------------------------------------------------------------------------|---------|
|                          | <b>26</b> | Study limitations, including sources of potential bias, statistical uncertainty, and generalizability | Page 16 |
|                          | <b>27</b> | Implications for practice, including the intended use and clinical role of the index test             | Page 17 |
| <b>OTHER INFORMATION</b> |           |                                                                                                       |         |
|                          | <b>28</b> | Registration number and name of registry                                                              | No      |
|                          | <b>29</b> | Where the full study protocol can be accessed                                                         | No      |
|                          | <b>30</b> | Sources of funding and other support; role of funders                                                 | Page 17 |
